# Supplementary material
Source: publisher site journal article supplement (https://www.dovepress.com/article/400150)
Supplement: Supplementary file 1 [file get_supplementary_file.php]

**Supplementary Table 1.** Characteristics of the study population, stratified by obesity status.

| <b>Variables</b>                    | <b>BMI&lt;28 kg/m<sup>2</sup></b> | <b>BMI≥28 kg/m<sup>2</sup></b> |
|-------------------------------------|-----------------------------------|--------------------------------|
| Age                                 | 57.7±10                           | 58.5±9.7                       |
| Sex                                 |                                   |                                |
| Female                              | 5266(62.5)                        | 819(68.9)                      |
| Male                                | 3165(37.5)                        | 370(31.1)                      |
| Body mass index, kg/m <sup>2</sup>  | 23.3±2.5                          | 30.1±2.1                       |
| Waist circumference, cm             | 81.3±8.3                          | 96±6.8                         |
| Waist-to-hip ratio                  | 0.88±0.07                         | 0.93±0.06                      |
| LDL cholesterol, mg/dl              | 126.1±29.8                        | 130.3±31.8                     |
| HDL cholesterol, mg/dl              | 62±13.6                           | 56±11.7                        |
| Triglycerides, mg/dl                | 116.9±80.1                        | 154±85.9                       |
| Triglycerides/HDL cholesterol ratio | 2.1±1.9                           | 3±2.1                          |
| Systolic blood pressure, mmHg       | 133.1±20.4                        | 141.7±21                       |
| Diastolic blood pressure, mmHg      | 84±11                             | 89.2±11.5                      |
| Fasting blood glucose, mg/dl        | 97.1±29.4                         | 104.7±31.5                     |
| <b>Metabolic disorders</b>          |                                   |                                |
| Increased LDL cholesterol           | 3364(39.9)                        | 553(46.5)                      |
| Decreased HDL cholesterol           | 815(9.7)                          | 246(20.7)                      |
| Increased triglycerides             | 1650(19.6)                        | 475(39.9)                      |
| Central obesity                     | 3490(41.4)                        | 1165(98)                       |
| Increased blood pressure            | 5124(60.8)                        | 952(80.1)                      |
| Increased fasting blood glucose     | 2234(26.5)                        | 517(43.5)                      |
| <b>Medications</b>                  |                                   |                                |
| Lipid-lowering drugs                | 140(1.7)                          | 43(3.6)                        |
| Anti-diabetic drugs                 | 585(6.9)                          | 166(14)                        |
| Anti-hypertensive drugs             | 1241(14.7)                        | 375(31.5)                      |
| <b>Smoking</b>                      |                                   |                                |
| Never                               | 76(0.9)                           | 902(75.9)                      |
| Former                              | 751(8.9)                          | 85(7.1)                        |
| Current                             | 1584(18.8)                        | 180(15.1)                      |
| Unknown                             | 120(1.4)                          | 22(1.9)                        |
| <b>Alcohol drinking</b>             |                                   |                                |
| Never                               | 6991(82.9)                        | 978(82.3)                      |
| Former                              | 243(2.9)                          | 40(3.4)                        |
| Current                             | 997(11.8)                         | 142(11.9)                      |
| Unknown                             | 200(2.4)                          | 29(2.4)                        |

Abbreviations: LDL, low-density lipoprotein; HDL, high-density lipoprotein.

**Supplementary Table 2.** Slopes (95% CIs) of the linear association between anthropometric indices and lipids.

| <b>Variables</b>                           | <b>Slope (95% CI)*</b> | <b>P value</b> |
|--------------------------------------------|------------------------|----------------|
| <b>LDL cholesterol</b>                     |                        |                |
| BMI (kg/m <sup>2</sup> )                   | 0.71(0.51,0.91)        | <0.001         |
| WC (cm)                                    | 0.29(0.23,0.35)        | <0.001         |
| WHR                                        | 47.20(37.48,56.92)     | <0.001         |
| <b>HDL cholesterol</b>                     |                        |                |
| BMI (kg/m <sup>2</sup> )                   | -1.10(-1.18,-1.02)     | <0.001         |
| WC (cm)                                    | -0.40(-0.42,-0.38)     | <0.001         |
| WHR                                        | -47.9(-52.04,-43.76)   | <0.001         |
| <b>Triglycerides</b>                       |                        |                |
| BMI (kg/m <sup>2</sup> )                   | 4.29(3.80,4.78)        | <0.001         |
| WC (cm)                                    | 1.70(1.52,1.88)        | <0.001         |
| WHR                                        | 230.9(205.81,255.99)   | <0.001         |
| <b>Triglycerides/HDL cholesterol ratio</b> |                        |                |
| BMI (kg/m <sup>2</sup> )                   | 0.14(0.12,0.16)        | <0.001         |
| WC (cm)                                    | 0.05(0.05,0.05)        | <0.001         |
| WHR                                        | 6.98(6.35,7.61)        | <0.001         |

\* Adjusted for age, sex and number of metabolic disorders (excluding central obesity and the lipid of focus). Abbreviations: BMI, body mass index; CI, confidence interval; LDL, low-density lipoprotein; HDL, high-density lipoprotein; WC, waist circumference; WHR, waist-to-hip ratio.

**Supplementary Table 3.** Slopes (95% CIs) of the association between anthropometric indices and lipids below or above the estimated break point in prospective study among population with repeated measurements.

| Variables                                  | Break-point | Below break-point   |         | Above break-point  |         |
|--------------------------------------------|-------------|---------------------|---------|--------------------|---------|
|                                            |             | Slope (95% CI)*     | P value | Slope (95% CI)*    | P value |
| <b>LDL cholesterol</b>                     |             |                     |         |                    |         |
| BMI (kg/m <sup>2</sup> )                   | 22          | 2.03(0.46,3.60)     | 0.011   | 0.16(-0.33,0.65)   | 0.539   |
| WC (cm)                                    | 79          | 0.59(0.20,0.98)     | 0.003   | 0.04(-0.18,0.26)   | 0.671   |
| WHR                                        | 0.9         | 72.0(38.9,105.1)    | <0.001  | 19.2(-23.9,62.3)   | 0.383   |
| <b>HDL cholesterol</b>                     |             |                     |         |                    |         |
| BMI (kg/m <sup>2</sup> )                   | 27          | -1.51(-1.73,-1.29)  | <0.001  | -0.36(-0.87,0.15)  | 0.164   |
| WC (cm)                                    | 96          | -0.54(-0.60,-0.48)  | <0.001  | 0.22(-0.13,0.57)   | 0.232   |
| WHR                                        | 1.0         | -59.92(-67.9,-51.9) | <0.001  | 12.5(-75.1,100.1)  | 0.780   |
| <b>Triglycerides</b>                       |             |                     |         |                    |         |
| BMI (kg/m <sup>2</sup> )                   | 26          | 4.47(2.80,6.14)     | <0.001  | 3.47(0.88,6.06)    | 0.009   |
| WC (cm)                                    | 86          | 2.00(1.45,2.55)     | <0.001  | 1.00(0,2.00)       | 0.049   |
| WHR                                        | 1.0         | 220.0(169.0,270.9)  | <0.001  | 577.5(8.3,1146.7)  | 0.049   |
| <b>Triglycerides/HDL cholesterol ratio</b> |             |                     |         |                    |         |
| BMI (kg/m <sup>2</sup> )                   | 26          | 0.14(0.10,0.18)     | <0.001  | 0.09(0.03,0.15)    | 0.008   |
| WC (cm)                                    | 95          | 0.06(0.05,0.07)     | <0.001  | -0.001(-0.06,0.06) | 0.975   |
| WHR                                        | 1.0         | 6.80(5.57,8.03)     | <0.001  | 8.66(-4.67,21.99)  | 0.205   |

\* Adjusted for age, sex and number of metabolic disorders (excluding central obesity and the lipid of focus). Abbreviations: BMI, body mass index; CI, confidence interval; LDL, low-density lipoprotein; HDL, high-density lipoprotein; WC, waist circumference; WHR, waist-to-hip ratio.

**Supplementary Table 4.** Characteristics of women in the study population, stratified by menopause.

| <b>Variables</b>                    | <b>Post-menopause(N=4415)</b> | <b>Pre-menopause(N=1577)</b> |
|-------------------------------------|-------------------------------|------------------------------|
| Age                                 | 61.0±60.8                     | 44.9±44.6                    |
| Body mass index, kg/m <sup>2</sup>  | 24.5±24.4                     | 23.7±23.5                    |
| Waist circumference,cm              | 83.3±83.0                     | 78.0±77.6                    |
| Waist-to-hip ratio                  | 0.9±0.9                       | 0.8±0.8                      |
| LDL cholesterol, mg/dl              | 132.4±131.5                   | 114.1±112.7                  |
| HDL cholesterol, mg/dl              | 64.2±63.8                     | 63.6±63.0                    |
| Triglycerides, mg/dl                | 125.8±123.3                   | 98.6±95.0                    |
| Triglycerides/HDL cholesterol ratio | 2.2±1.9                       | 1.7±1.7                      |

Abbreviations: LDL, low-density lipoprotein; HDL, high-density lipoprotein.

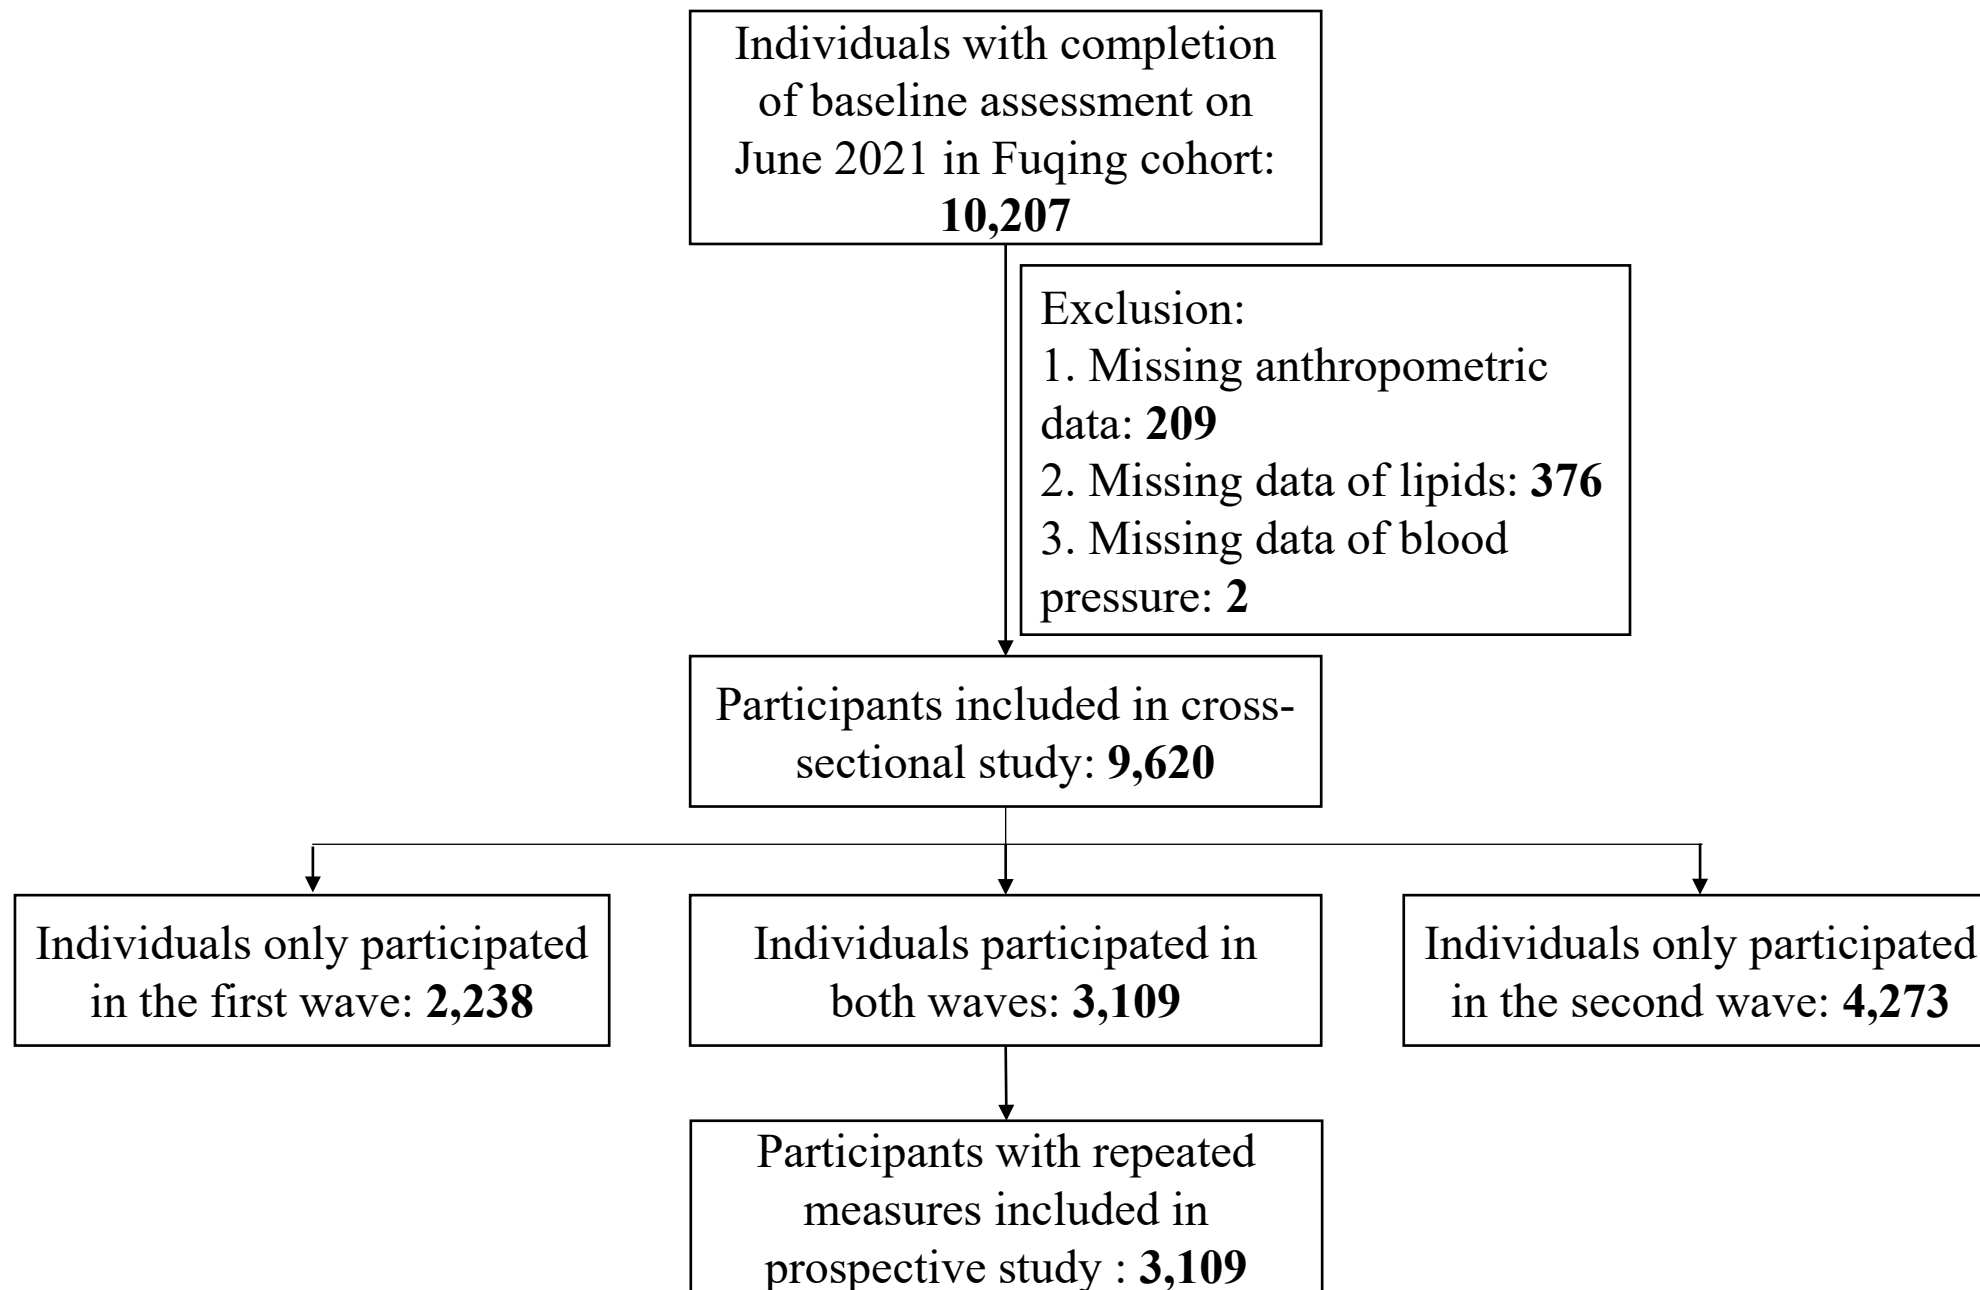

**Supplementary Figure 1.** Flowchart of the study population.

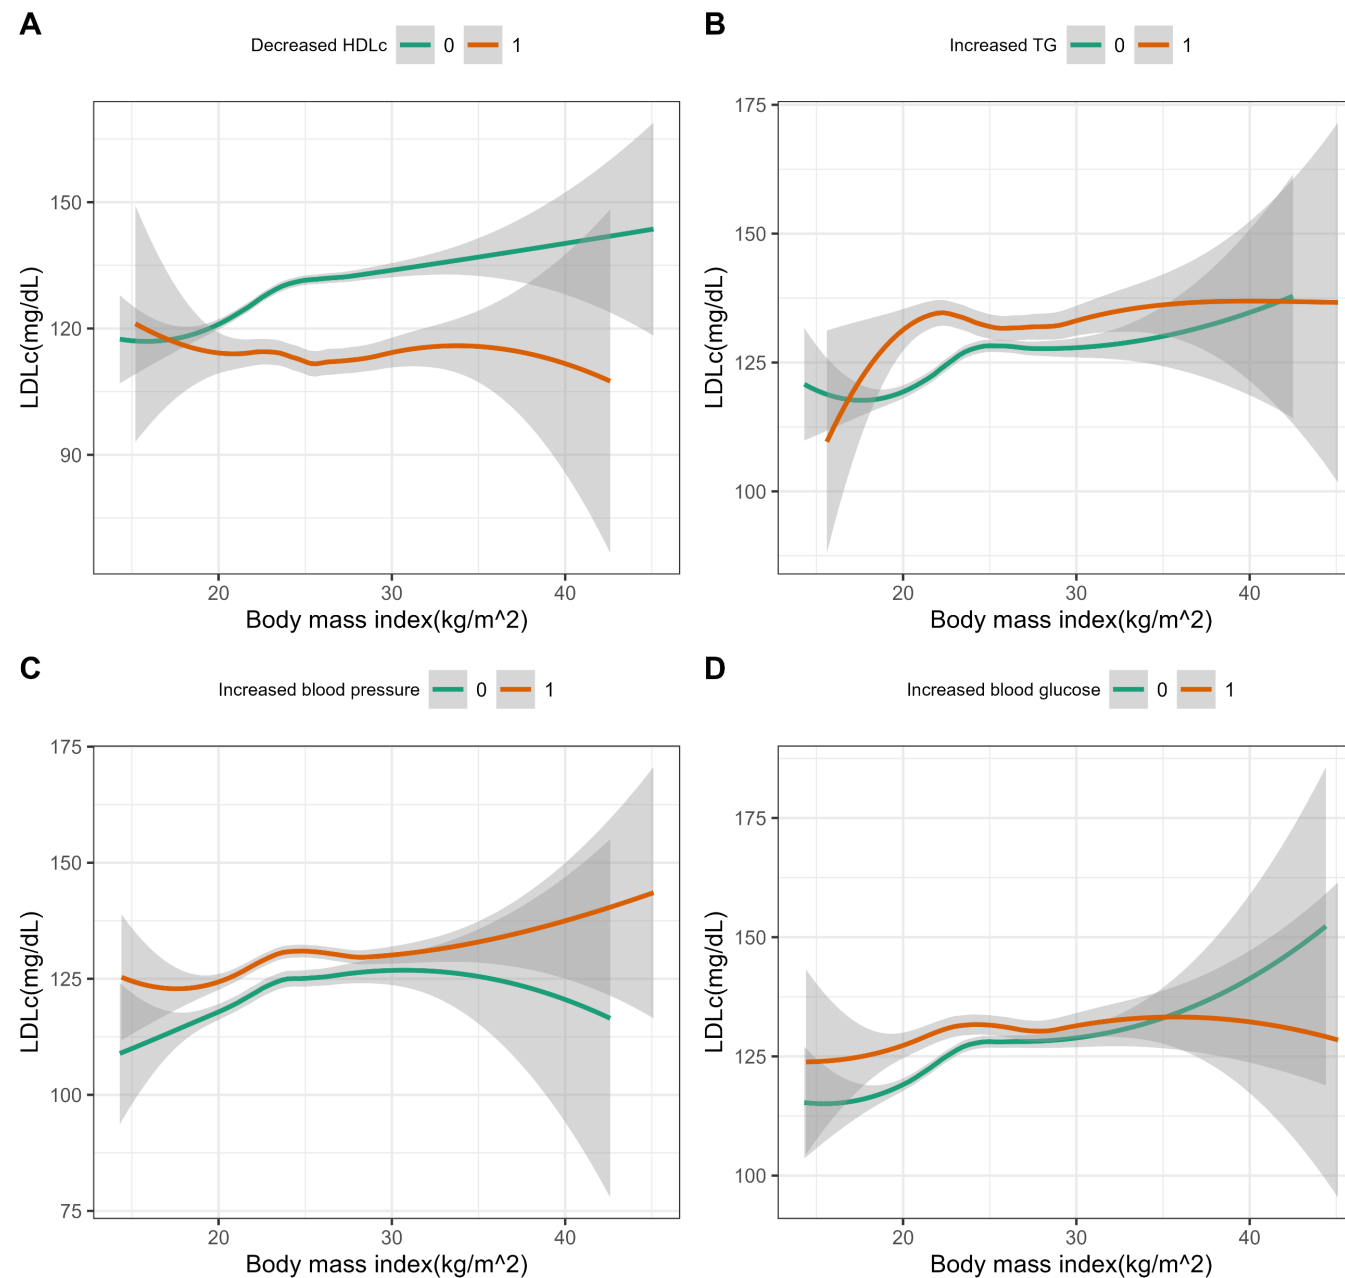

**Supplementary Figure 2.** Loess regressions between body mass index and LDL cholesterol stratified by specific metabolic disorder. A. Stratified by decreased HDL cholesterol; B. Stratified by increased triglycerides; C. Stratified by increased blood pressure ; D. Stratified by increased blood glucose.

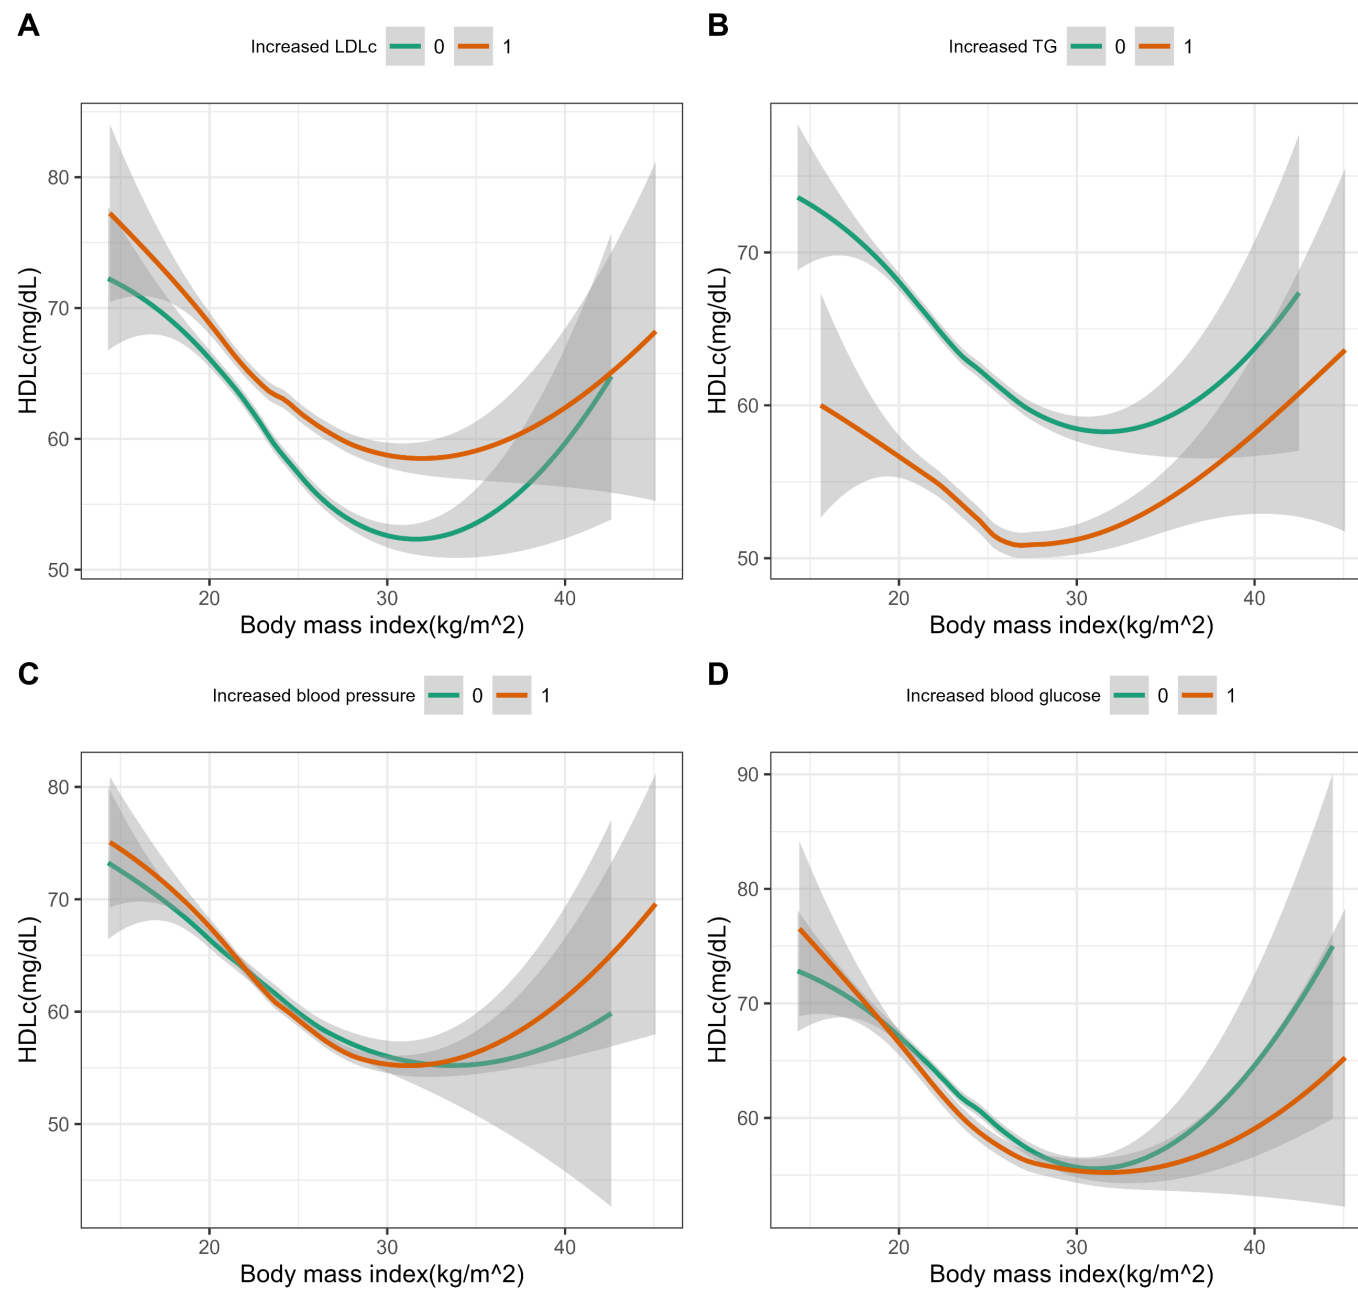

**Supplementary Figure 3.** Loess regressions between body mass index and HDL cholesterol stratified by specific metabolic disorder. A. Stratified by increased LDL cholesterol; B. Stratified by increased triglycerides; C. Stratified by increased blood pressure ; D. Stratified by increased blood glucose.

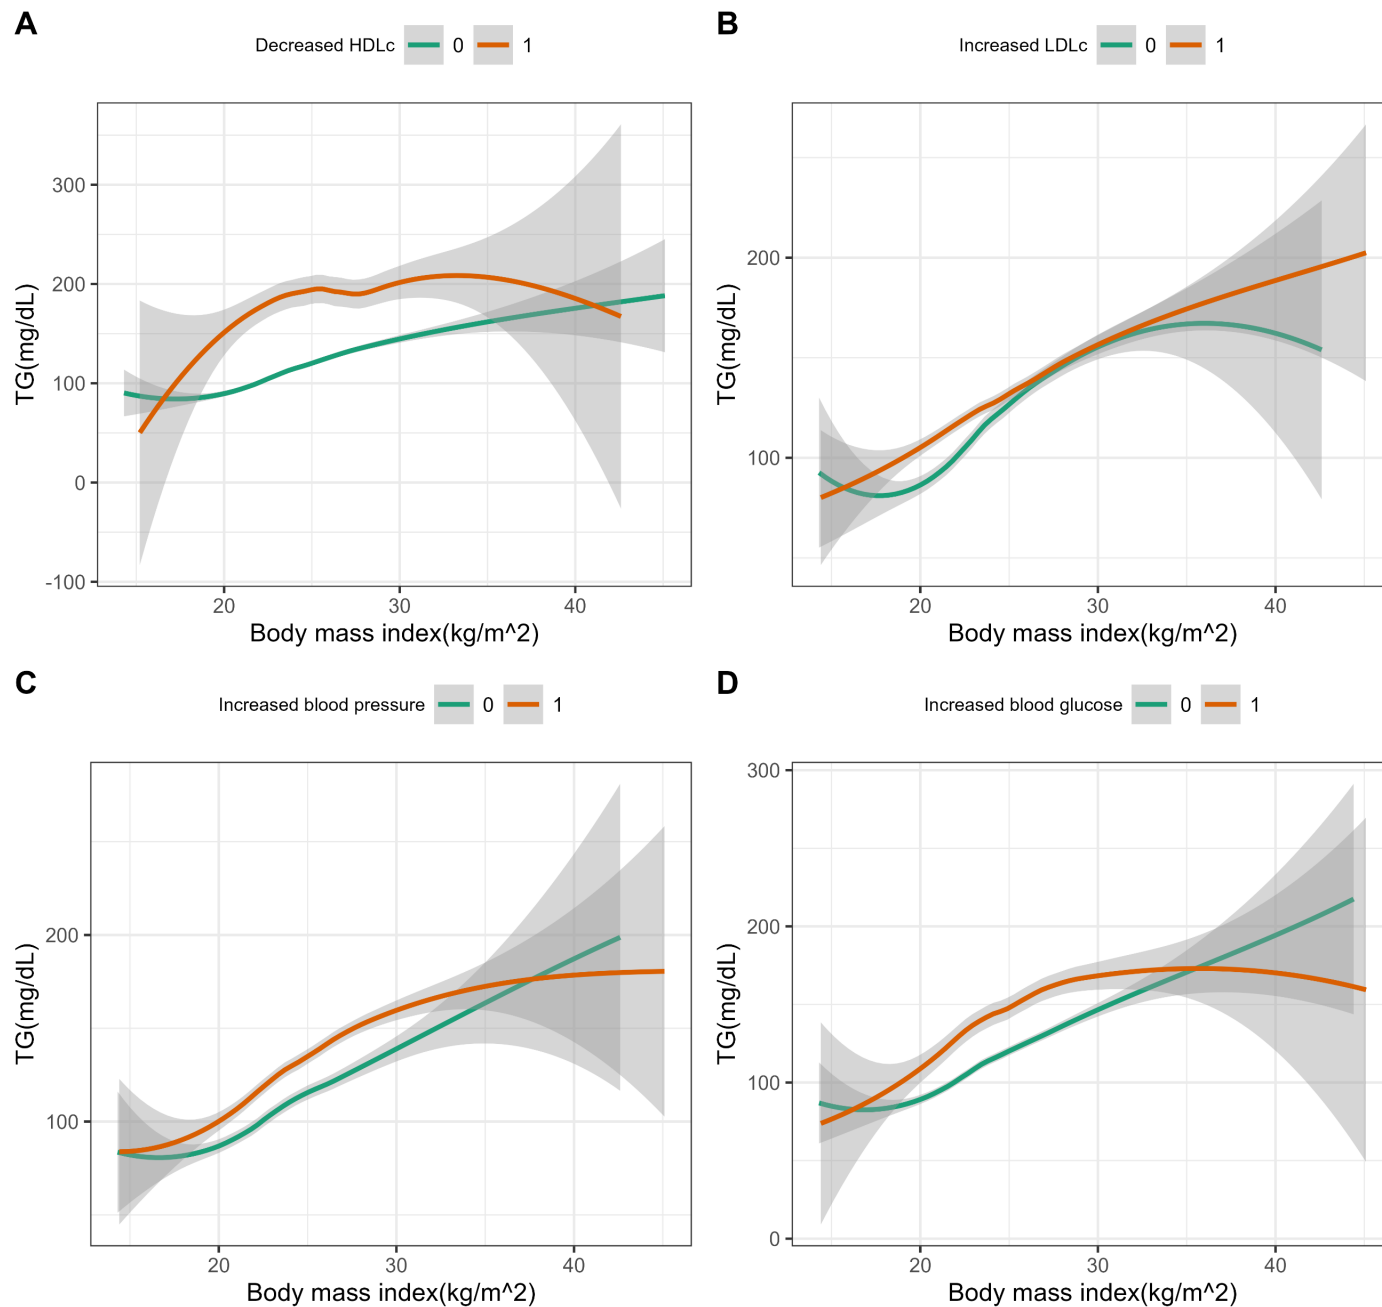

**Supplementary Figure 4.** Loess regressions between body mass index and triglycerides stratified by specific metabolic disorder. A. Stratified by decreased HDL cholesterol; B. Stratified by increased LDL cholesterol; C. Stratified by increased blood pressure ; D. Stratified by increased blood glucose.



**A**Increased LDLc ■ 0 ■ 1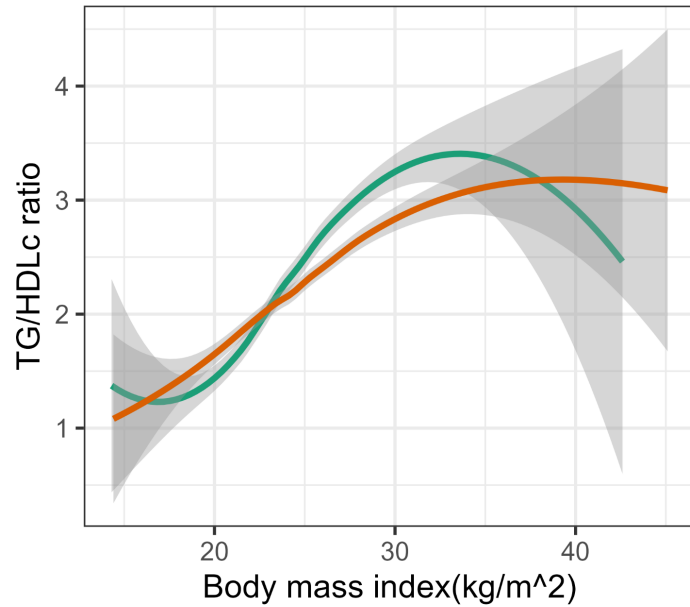**B**Increased blood pressure ■ 0 ■ 1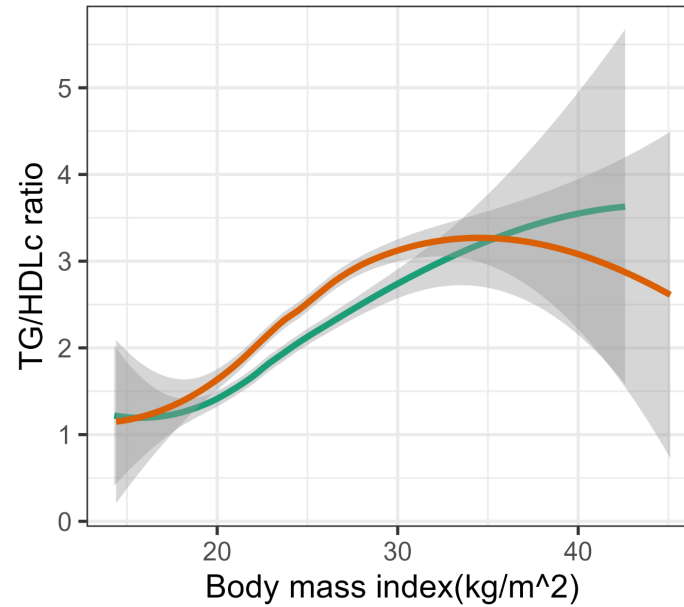**C**Increased blood glucose ■ 0 ■ 1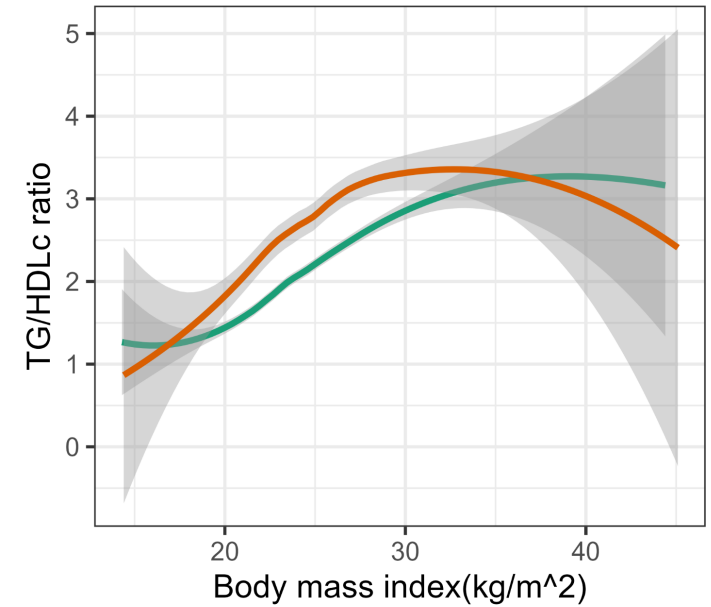

**Supplementary Figure 5.** Loess regressions between body mass index and triglycerides-to-HDL cholesterol ratio stratified by specific metabolic disorder. A. Stratified by increased LDL cholesterol; B. Stratified by increased blood pressure; C. Stratified by increased blood glucose.

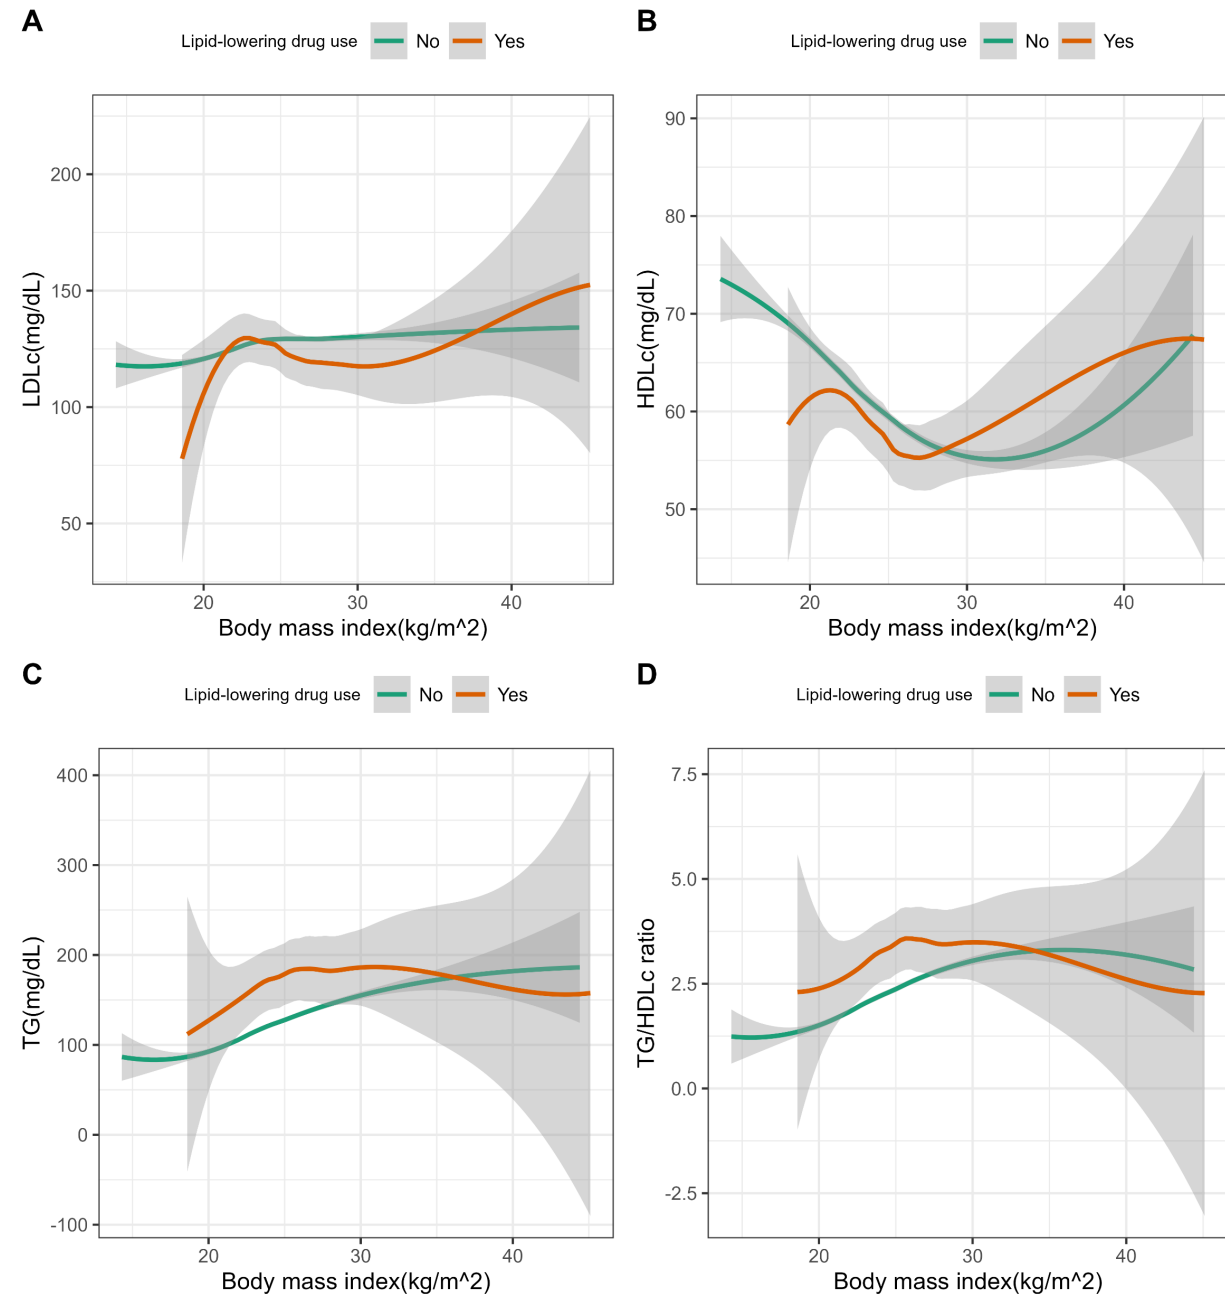

**Supplementary Figure 6.** Loess regressions between body mass index and lipids, stratified by using lipid-lowering drugs or not. A. Body mass index and LDL cholesterol; B. Body mass index and HDL cholesterol; C. Body mass index and triglycerides; D. Body mass index and triglycerides-to-HDL cholesterol ratio.

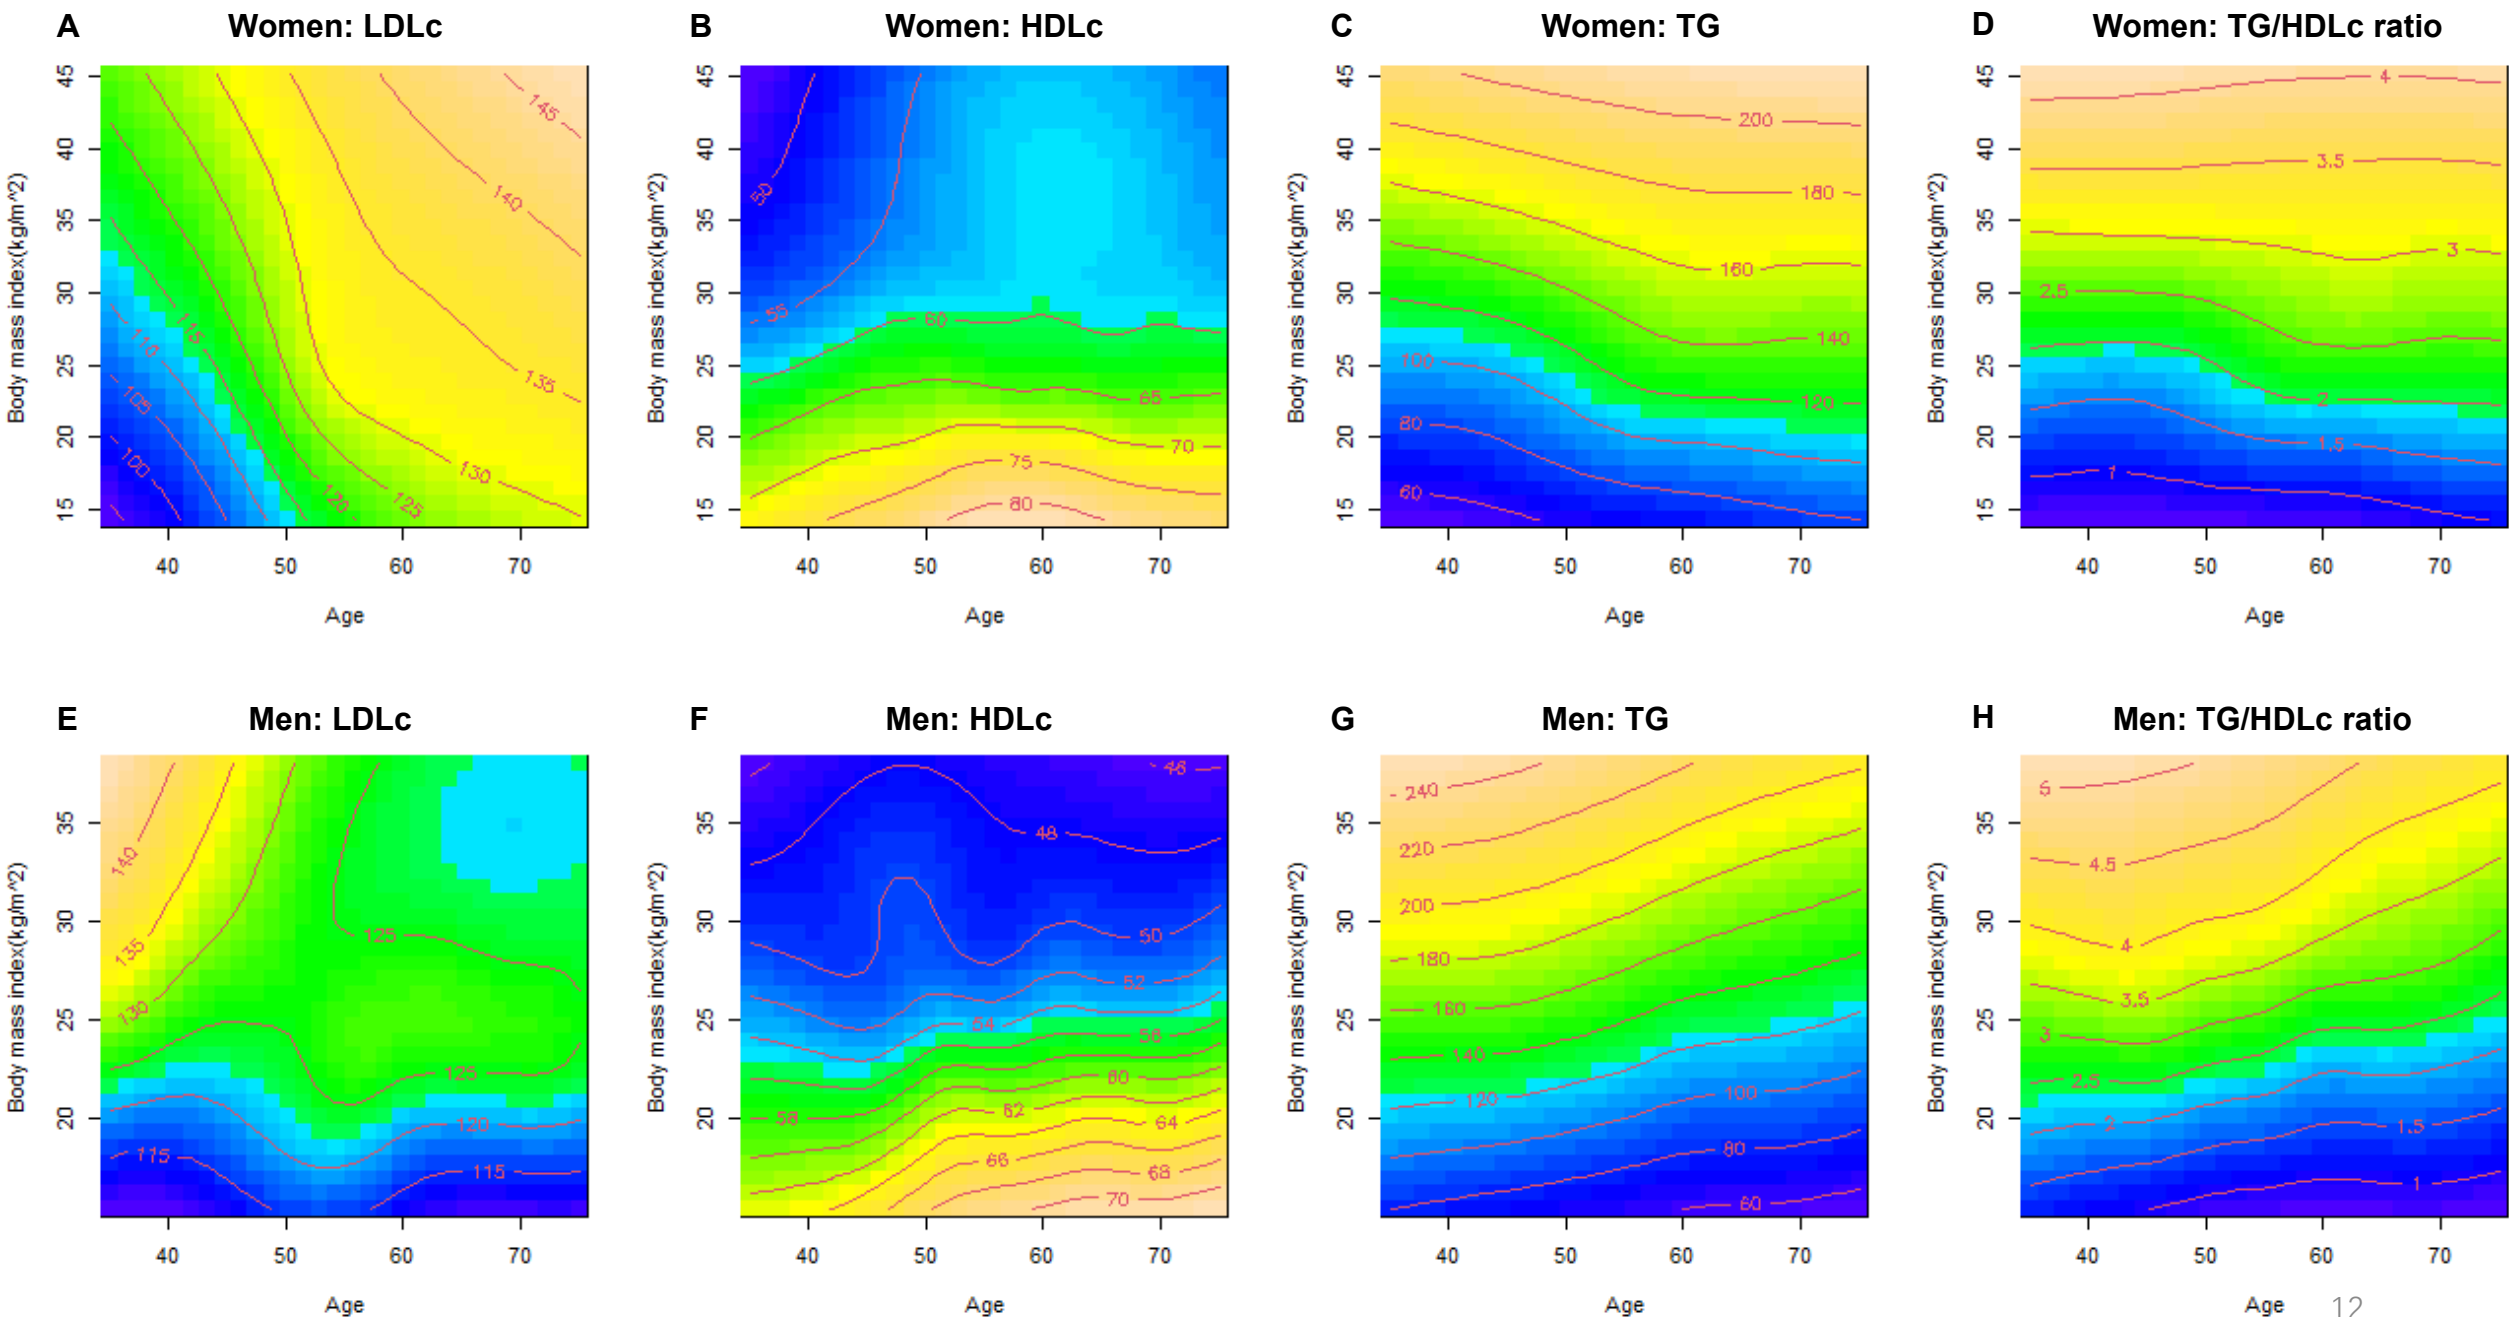

**Supplementary Figure 7.** Contour plots between age, body mass index and lipids in women and men respectively. A. LDL cholesterol in women; B. HDL cholesterol in women; C. Triglycerides in women; D. Triglycerides-to-HDL cholesterol ratio in women; E. LDL cholesterol in men; F. HDL cholesterol in men; G. Triglycerides in men; H. Triglycerides-to-HDL cholesterol ratio in men.

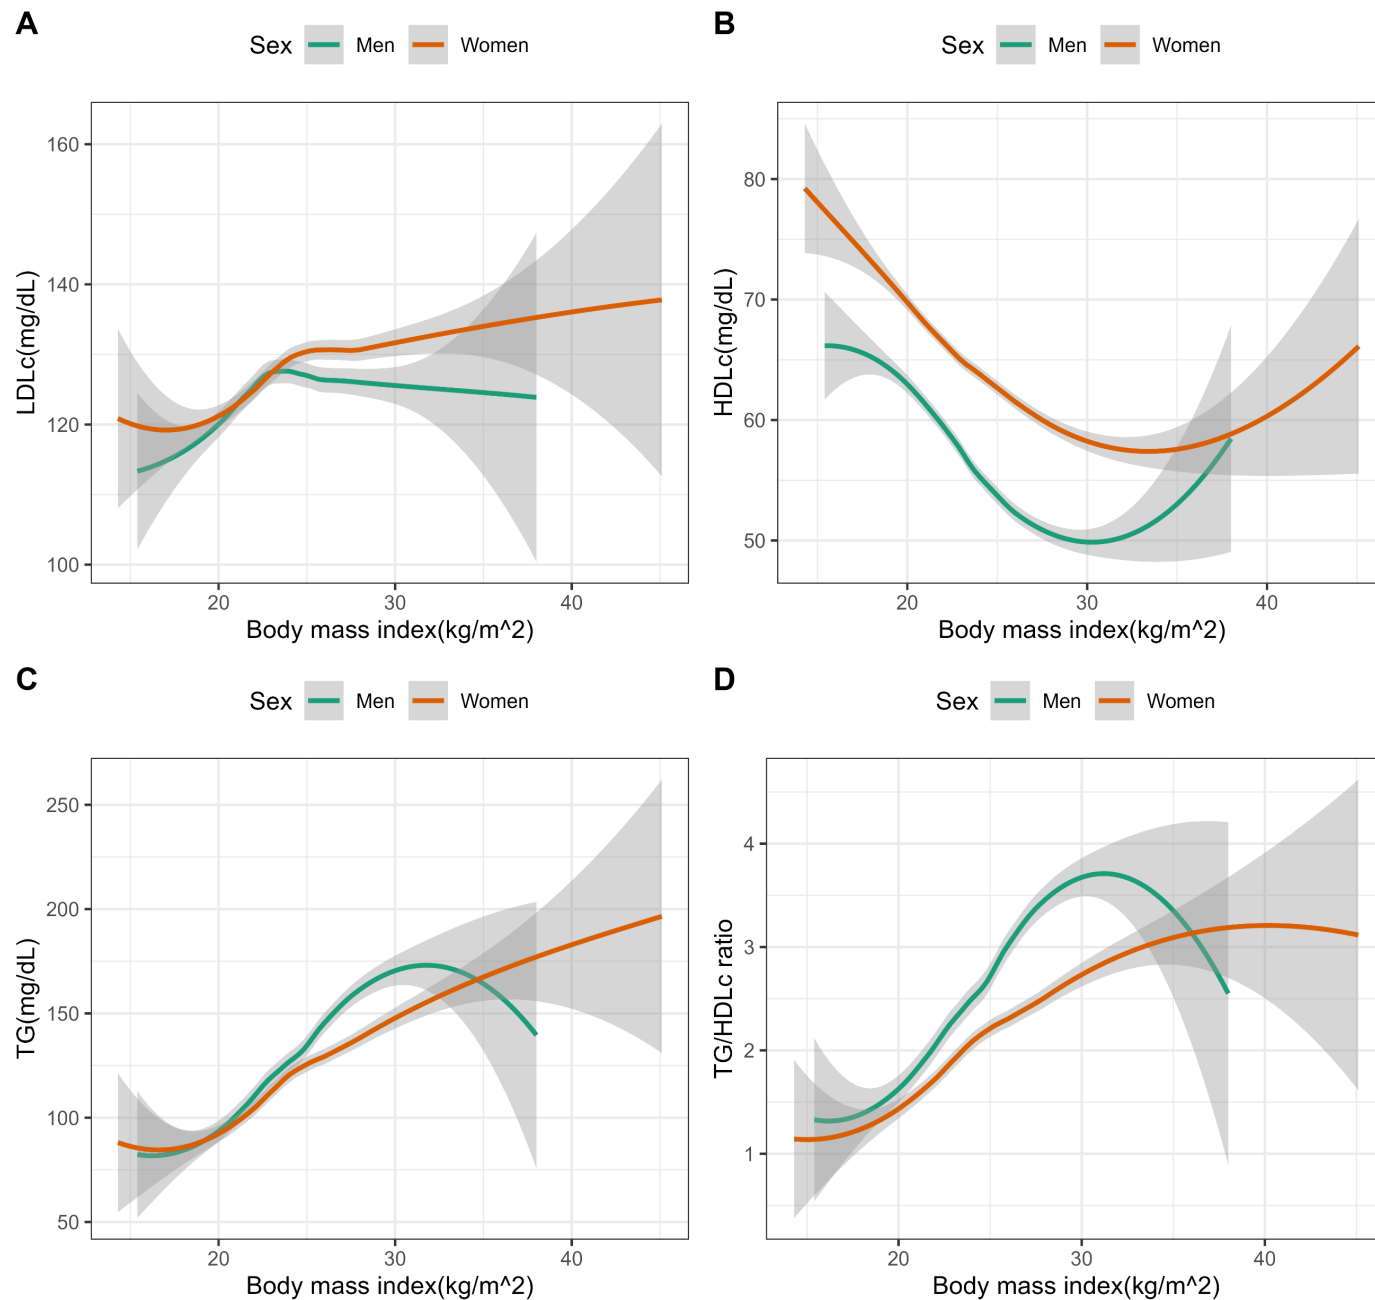

**Supplementary Figure 8.** Loess regressions between body mass index and lipids, stratified by sex. A. Body mass index and LDL cholesterol; B. Body mass index and HDL cholesterol; C. Body mass index and triglycerides; D. Body mass index and triglycerides-to-HDL cholesterol ratio.

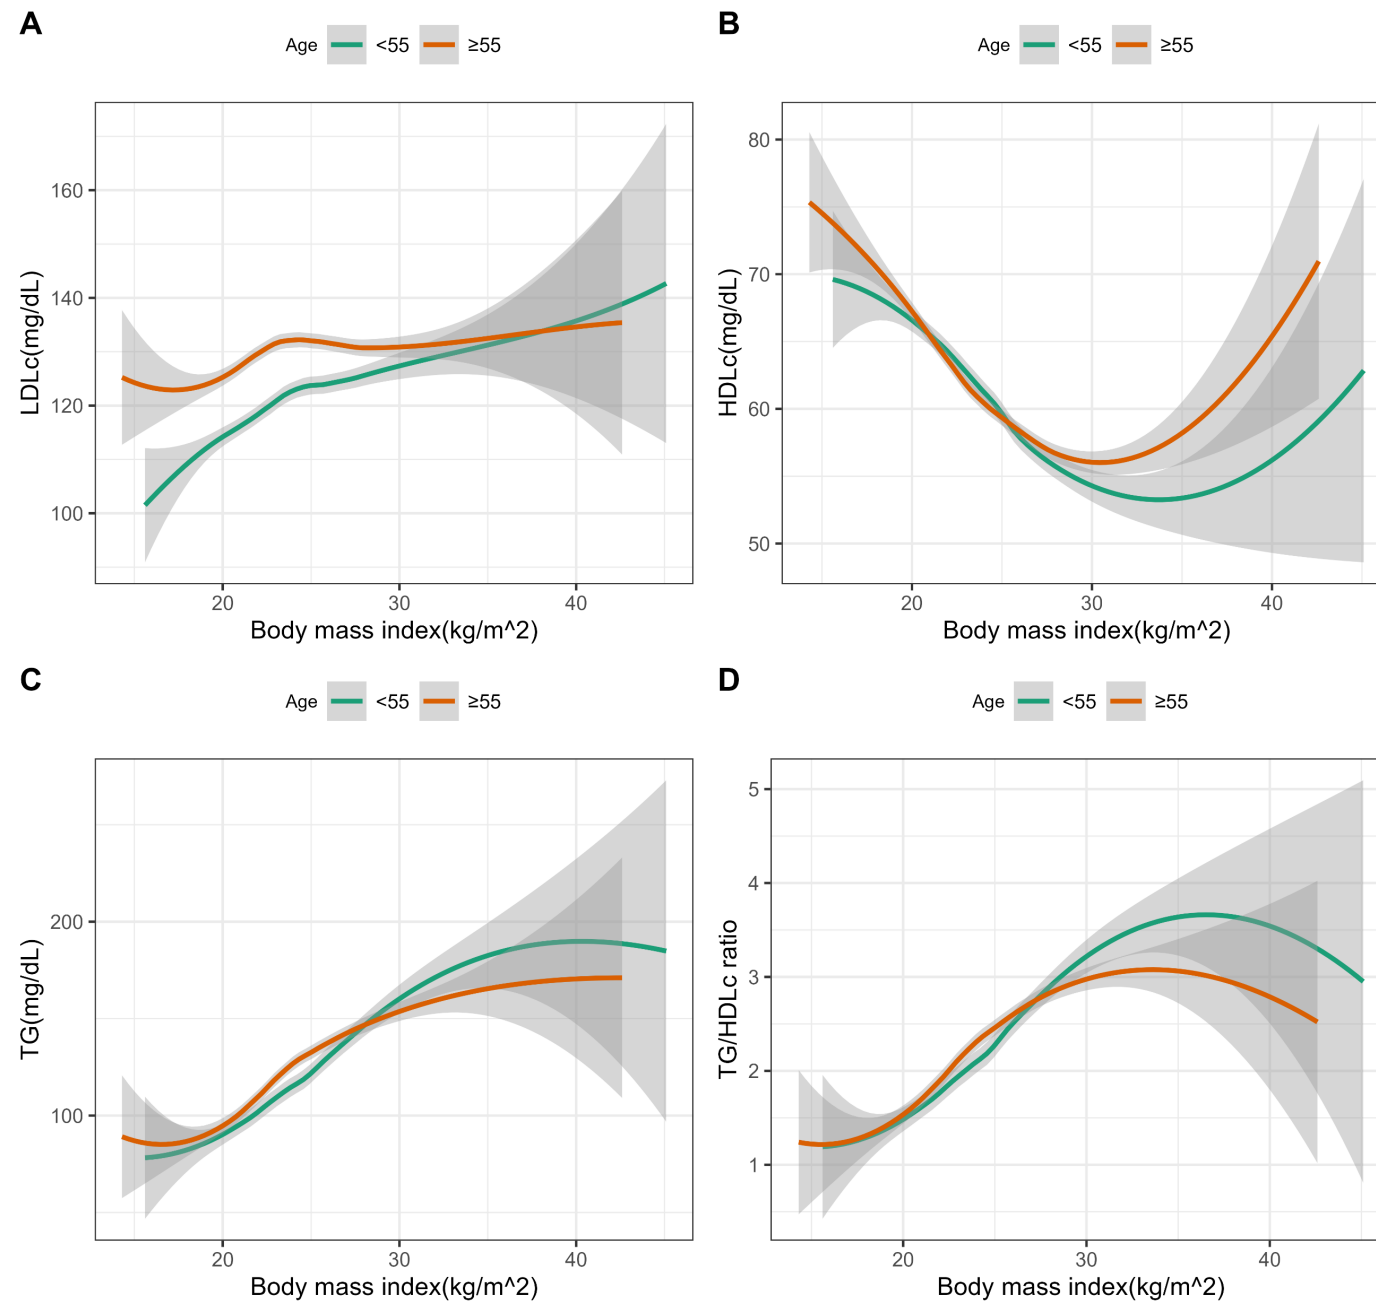

**Supplementary Figure 9.** Loess regressions between body mass index and lipids, stratified by age. A. Body mass index and LDL cholesterol; B. Body mass index and HDL cholesterol; C. Body mass index and triglycerides; D. Body mass index and triglycerides-to-HDL cholesterol ratio.

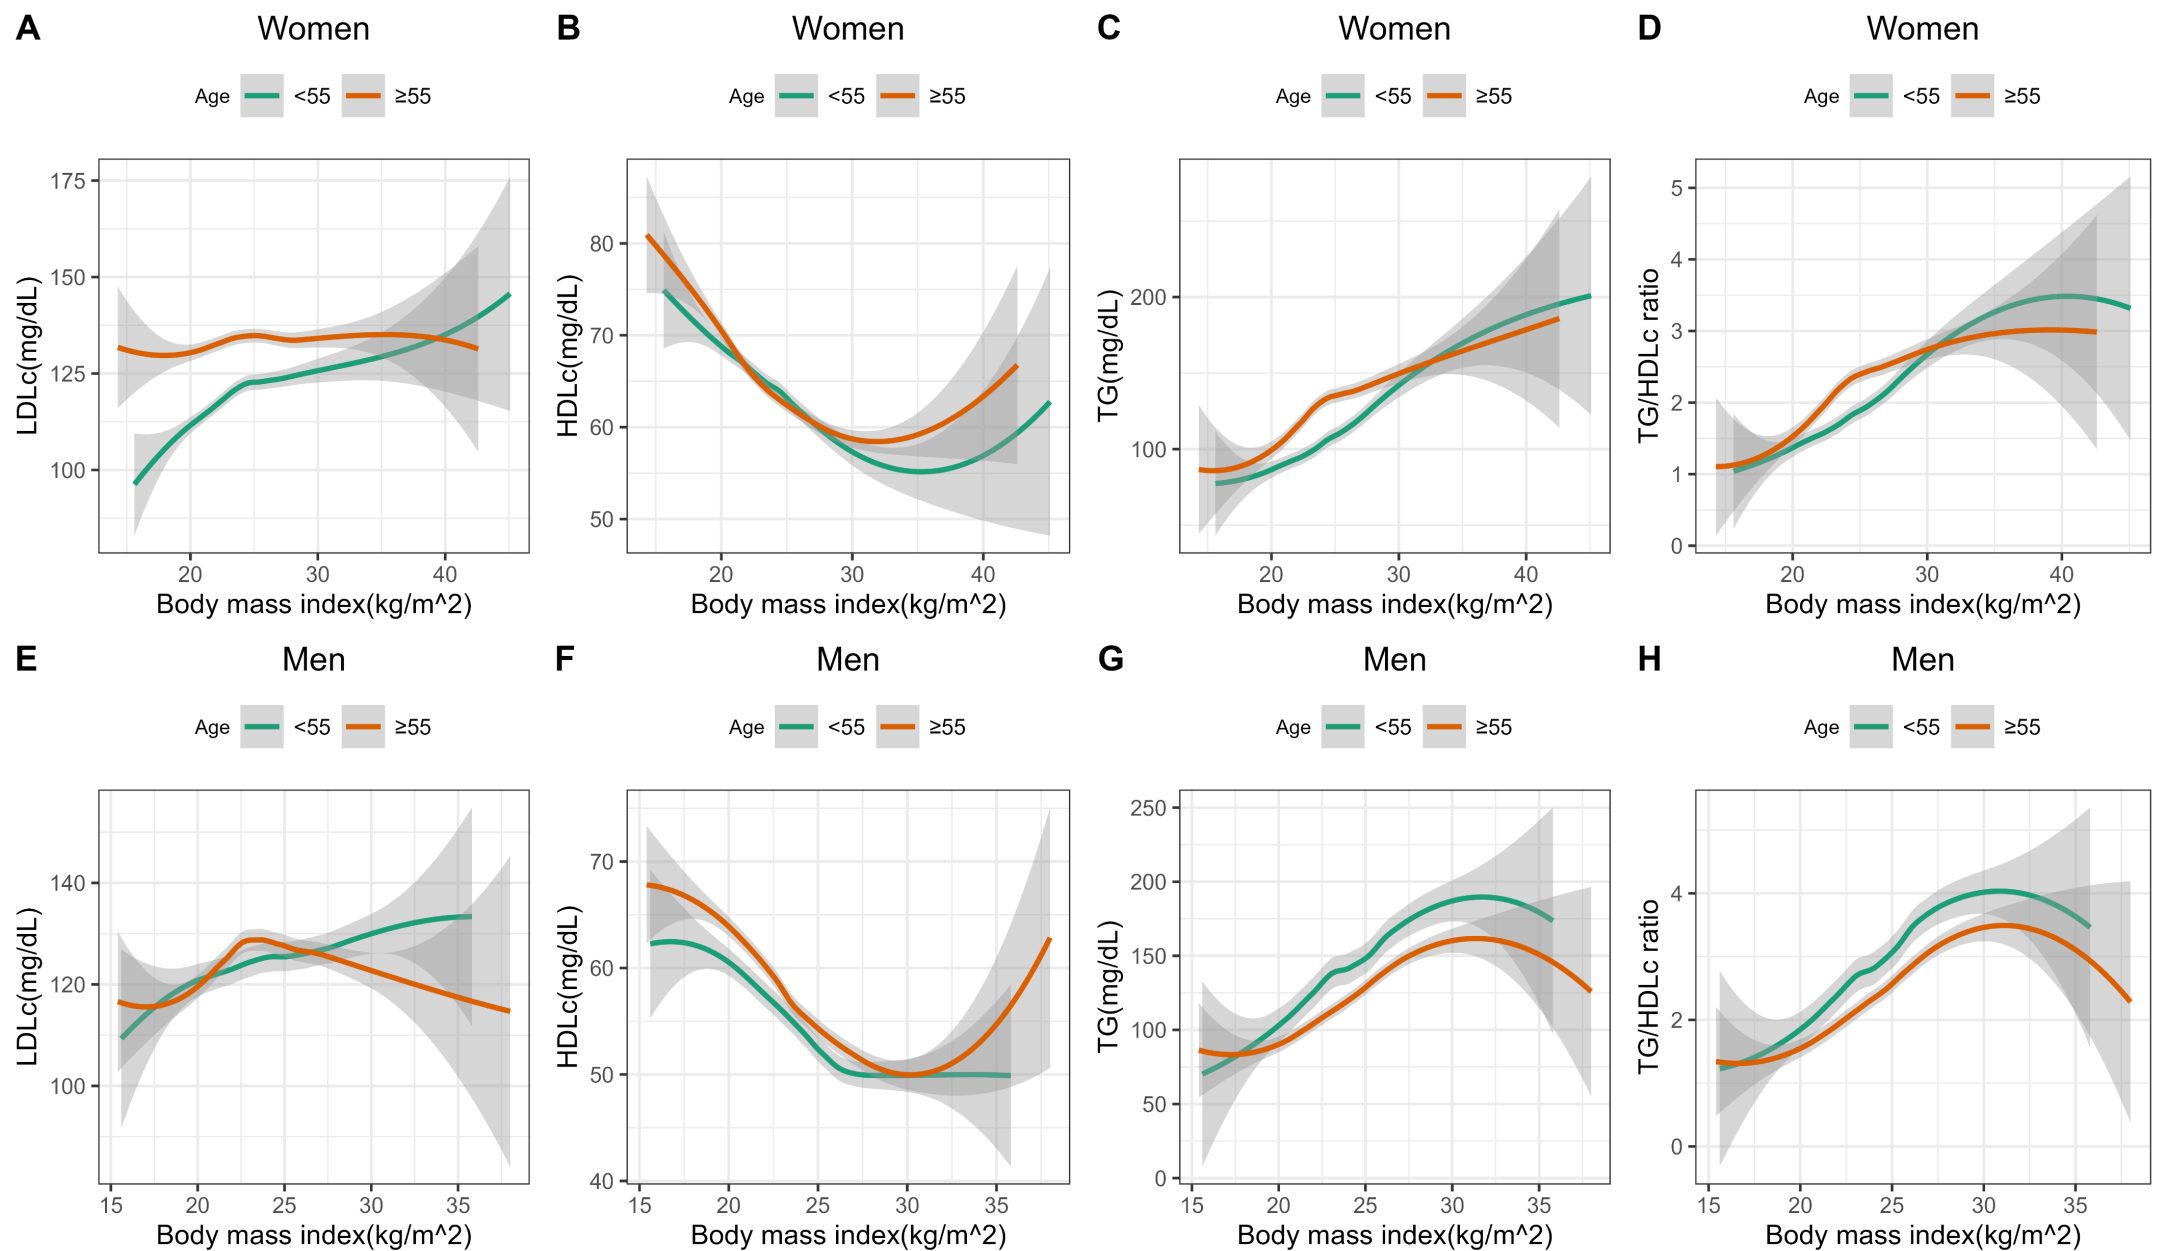

**Supplementary Figure 10.** Loess regressions between body mass index and lipids stratified by sex and age.

A. Body mass index and LDL cholesterol in women; B. Body mass index and HDL cholesterol in women; C. Body mass index and triglycerides in women; D. Body mass index and triglycerides-to-HDL cholesterol in women; E. Body mass index and LDL cholesterol in men; F. Body mass index and HDL cholesterol in men; G. Body mass index and triglycerides in men; H. Body mass index and triglycerides-to-HDL cholesterol ratio in men.

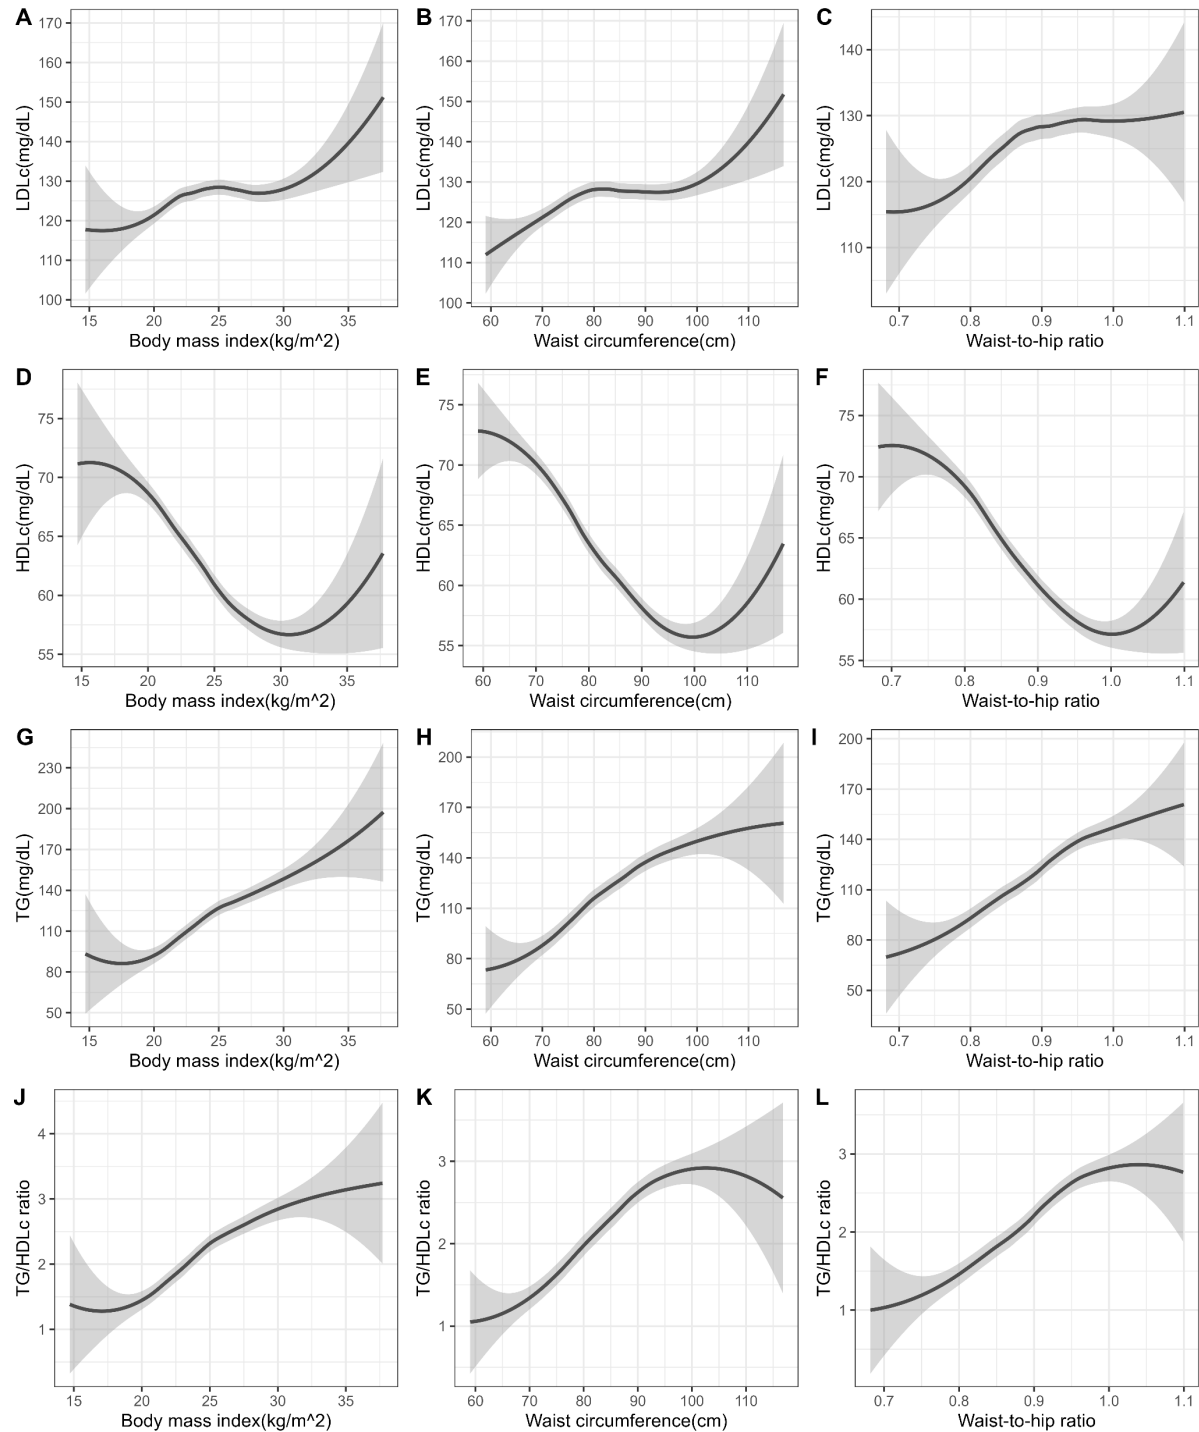

**Supplementary Figure 11.** Loess regressions between anthropometric indices and lipids in prospective study.

A. Body mass index and LDL cholesterol; B. Waist circumference and LDL cholesterol; C. Waist-to-hip ratio and LDL cholesterol; D. Body mass index and HDL cholesterol; E. Waist circumference and HDL cholesterol; F. Waist-to-hip ratio and HDL cholesterol; G. Body mass index and triglycerides; H. Waist circumference and triglycerides; I. Waist-to-hip ratio and triglycerides; J. Body mass index and triglycerides-to-HDL cholesterol ratio; K. Waist circumference and triglycerides-to-HDL cholesterol ratio; L. Waist-to-hip ratio and triglycerides-to-HDL cholesterol ratio.
